# Supplementary material for: New insight into long non-coding RNAs associated with bone metastasis of breast cancer based on an integrated analysis
Source: Cancer Cell Int. 2021 Jul 13;21:372. doi: 10.1186/s12935-021-02068-7 (PMC8276423; doi:10.1186/s12935-021-02068-7)
Supplement: Supplementary file 2 — Additional file 2: Table S2. Differential expressed mRNAs detected in metastatic tumor tissues of breast cancer between bone and lung metastatic sites (bone vs lung). [file 12935_2021_2068_MOESM2_ESM.csv]

ID	Symbol	Combined.ES	P.Value	FDR	UpDown	top10	top50
6439	SFTPB	-2.166437029	1.42E-08	0.000168396	Down	yes	yes
25903	OLFML2B	2.168798155	4.24E-08	0.000168396	Up	yes	yes
6440	SFTPC	-2.090624225	5.58E-08	0.000168396	Down	yes	yes
2042	EPHA3	2.013702769	6.89E-08	0.000168396	Up	yes	yes
6441	SFTPD	-2.002719668	8.85E-08	0.000180323	Down	yes	yes
4322	MMP13	2.052278091	2.04E-07	0.00034966	Up	yes	yes
28959	TMEM176B	-1.962527568	2.57E-07	0.00034966	Down	yes	yes
7424	VEGFC	1.861892979	3.50E-07	0.000399478	Up	yes	yes
57125	PLXDC1	1.862164989	3.59E-07	0.000399478	Up	yes	yes
2200	FBN1	1.950889427	4.61E-07	0.000444806	Up	yes	yes
91316	LOC91316	-1.853404313	4.73E-07	0.000444806	Down	yes	yes
1301	COL11A1	1.902684727	6.15E-07	0.000503505	Up	yes	yes
54101	RIPK4	-1.871497185	6.18E-07	0.000503505	Down	yes	yes
2028	ENPEP	1.851383689	7.09E-07	0.000541783	Up	yes	yes
1513	CTSK	1.88521639	7.73E-07	0.000555821	Up	yes	yes
3381	IBSP	1.774880565	8.25E-07	0.000560402	Up	yes	yes
23314	SATB2	1.823320017	1.04E-06	0.000670664	Up		yes
4318	MMP9	1.742610963	1.22E-06	0.000675274	Up		yes
91353	IGLL3P	-1.816699134	1.22E-06	0.000675274	Down	yes	yes
4487	MSX1	1.74477208	1.27E-06	0.000675274	Up		yes
4131	MAP1B	1.822979367	1.34E-06	0.00068294	Up		yes
10085	EDIL3	1.740632118	1.50E-06	0.000731802	Up		yes
5806	PTX3	1.706122605	2.01E-06	0.000943963	Up		yes
745	C11orf9	-1.755457889	2.20E-06	0.000978004	Down	yes	yes
5475	PPEF1	1.707007814	2.24E-06	0.000978004	Up		yes
85458	DIXDC1	1.760493914	3.14E-06	0.001256367	Up		yes
718	C3	-1.656922635	3.17E-06	0.001256367	Down	yes	yes
1300	COL10A1	1.771856896	3.19E-06	0.001256367	Up		yes
79783	C7orf10	1.64569231	3.82E-06	0.001413632	Up		yes
653238	GTF2H2B	1.712957355	4.24E-06	0.001525002	Up		yes
3507	IGHM	-1.672279524	4.77E-06	0.001651369	Down	yes	yes
6332	SCN7A	-1.727918183	4.88E-06	0.001651369	Down		yes
145389	SLC38A6	1.612581183	5.00E-06	0.001651369	Up		yes
4958	OMD	1.66292437	5.18E-06	0.001667818	Up		yes
219699	UNC5B	1.680751321	5.33E-06	0.001671196	Up		yes
1464	CSPG4	1.684652037	5.51E-06	0.001683422	Up		yes
9603	NFE2L3	-1.666861233	6.57E-06	0.001950916	Down		yes
1593	CYP27A1	-1.606529869	6.70E-06	0.001950916	Down		yes
9249	DHRS3	-1.605987379	7.07E-06	0.002008684	Down		yes
51226	COPZ2	1.639311649	7.40E-06	0.002055712	Up		yes
1311	COMP	1.675763897	7.68E-06	0.002086107	Up		yes
4082	MARCKS	1.704229993	9.30E-06	0.002321079	Up		yes
2149	F2R	1.644443899	1.01E-05	0.002397054	Up		yes
187	APLNR	1.555307908	1.02E-05	0.002397054	Up		yes
66008	TRAK2	1.526713636	1.18E-05	0.002644868	Up		yes
9652	TTC37	1.573430069	1.25E-05	0.002729521	Up		yes
9413	FAM189A2	-1.561432946	1.51E-05	0.003235451	Down		yes
7130	TNFAIP6	1.505694767	1.62E-05	0.003415235	Up		yes
1291	COL6A1	1.588404837	1.69E-05	0.003509854	Up		yes
79098	C1orf116	-1.603745419	1.74E-05	0.003547495	Down		yes
1123	CHN1	1.524362046	1.90E-05	0.00372827	Up		yes
8846	ALKBH1	1.512563231	1.92E-05	0.00372827	Up		yes
5396	PRRX1	1.539893857	2.16E-05	0.004125991	Up		yes
6387	CXCL12	1.566435239	2.26E-05	0.004255061	Up		yes
1284	COL4A2	1.463031342	2.53E-05	0.004632189	Up		yes
3399	ID3	1.468644656	2.54E-05	0.004632189	Up		yes
4239	MFAP4	-1.451382047	2.74E-05	0.004905693	Down		yes
8805	TRIM24	-1.451234563	2.77E-05	0.004905693	Down		yes
3987	LIMS1	1.479068954	2.81E-05	0.004912868	Up		yes
10084	PQBP1	-1.485703211	3.19E-05	0.005438343	Down		yes
5176	SERPINF1	1.481226477	3.24E-05	0.005438343	Up		yes
4130	MAP1A	1.496008601	3.25E-05	0.005438343	Up		yes
8611	PPAP2A	1.481027398	3.37E-05	0.005445774	Up		yes
5650	KLK7	-3.355723557	3.39E-05	0.005445774	Down		yes
1462	VCAN	1.44589455	3.45E-05	0.005445774	Up		yes
55365	TMEM176A	-1.460822561	3.53E-05	0.005445774	Down		yes
131578	LRRC15	1.523212769	3.56E-05	0.005445774	Up		yes
7079	TIMP4	1.416448786	3.95E-05	0.00595683	Up		yes
6731	SRP72	1.459877944	4.18E-05	0.006114158	Up		yes
23294	ANKS1A	-1.414167415	4.20E-05	0.006114158	Down		yes
55830	GLT8D1	1.436530227	4.64E-05	0.006595519	Up		yes
2244	FGB	1.446225443	4.80E-05	0.006739707	Up		yes
9358	ITGBL1	1.406949391	5.37E-05	0.007376041	Up
3303	HSPA1A	1.472507874	5.48E-05	0.007447539	Up
10241	CALCOCO2	1.470866308	6.01E-05	0.007918682	Up
5054	SERPINE1	1.425272254	6.01E-05	0.007918682	Up
25975	EGFL6	-1.373981806	6.02E-05	0.007918682	Down		yes
4286	MITF	1.627498007	6.53E-05	0.008312621	Up
3696	ITGB8	-1.452804368	6.82E-05	0.008588925	Down		yes
1316	KLF6	1.360270362	7.36E-05	0.008996853	Up
5532	PPP3CB	1.404621272	7.62E-05	0.009222694	Up
64129	TINAGL1	-1.367211509	7.80E-05	0.009352812	Down		yes
361	AQP4	-1.614267773	8.13E-05	0.009649523	Down		yes
3339	HSPG2	1.399688698	8.56E-05	0.010065096	Up
4323	MMP14	1.392705628	8.73E-05	0.010162706	Up
2701	GJA4	1.333673517	9.09E-05	0.010425155	Up
6801	STRN	1.523258286	9.26E-05	0.010425155	Up
10468	FST	1.356353089	9.35E-05	0.010425155	Up
2158	F9	1.333374329	9.54E-05	0.010425155	Up
5270	SERPINE2	1.455106509	9.54E-05	0.010425155	Up
55752	11-Sep	1.370761159	9.61E-05	0.010425155	Up
26628	OR7E47P	-1.538848532	9.64E-05	0.010425155	Down		yes
79627	OGFRL1	-1.337704912	0.000103517	0.01108457	Down		yes
50507	NOX4	1.346949903	0.000104281	0.01108457	Up
54974	THG1L	1.384149246	0.000108384	0.01142138	Up
55282	LRRC36	-1.341346297	0.000114652	0.011978724	Down		yes
80014	WWC2	1.327201106	0.000119279	0.012252633	Up
28831	IGLJ3	-1.356810145	0.000123628	0.012593583	Down		yes
55173	MRPS10	-1.300257985	0.000126217	0.01275102	Down		yes
2627	GATA6	-1.306141509	0.000130616	0.012876213	Down		yes
5228	PGF	1.345558649	0.000134603	0.013058603	Up
4325	MMP16	1.310597293	0.000137924	0.013275463	Up
3685	ITGAV	1.32818528	0.000147986	0.014023139	Up
314	AOC2	1.314687374	0.000153182	0.014403816	Up
25960	GPR124	1.292145959	0.000159199	0.014855373	Up
3357	HTR2B	-1.585789177	0.000165532	0.015329237	Down		yes
2186	BPTF	1.275778071	0.00016909	0.015541023	Up
11096	ADAMTS5	1.333427031	0.000175586	0.016017665	Up
526	ATP6V1B2	1.336931925	0.000180153	0.016192553	Up
92815	HIST3H2A	-1.278614482	0.00018181	0.016222268	Down		yes
9388	LIPG	-1.318788041	0.000184878	0.016376421	Down		yes
4734	NEDD4	1.281391486	0.000200173	0.017354005	Up
9509	ADAMTS2	1.294582131	0.000202104	0.017360698	Up
4012	LNPEP	1.285916815	0.000203091	0.017360698	Up
5159	PDGFRB	1.31904875	0.000207985	0.017577716	Up
9762	ProSAPiP1	-1.323071139	0.000209283	0.017577716	Down		yes
3678	ITGA5	1.322505923	0.000212243	0.017649404	Up
476	ATP1A1	-1.324214654	0.000214328	0.017702333	Down		yes
51123	ZNF706	-1.242345005	0.00022591	0.01841017	Down		yes
9140	ATG12	1.262498687	0.000227518	0.018418399	Up
3045	HBD	1.3346743	0.000232253	0.018678066	Up
51703	ACSL5	-1.2763369	0.000235621	0.018720259	Down		yes
7099	TLR4	1.242191897	0.000238173	0.018758018	Up
50833	TAS2R16	1.265171885	0.000239386	0.018758018	Up
871	SERPINH1	1.266596389	0.00025419	0.019638653	Up
90865	IL33	-1.322041507	0.000256902	0.019638653	Down		yes
10279	PRSS16	-1.298902767	0.000258513	0.019638653	Down		yes
3423	IDS	1.321578728	0.000259909	0.019638653	Up
4329	ALDH6A1	1.231310976	0.000261018	0.019638653	Up
7436	VLDLR	-1.249567922	0.000275539	0.020306612	Down		yes
2051	EPHB6	-1.231250088	0.000275761	0.020306612	Down		yes
6835	SURF2	-1.23861109	0.000281766	0.020461907	Down		yes
8600	TNFSF11	1.253970259	0.00028782	0.020626921	Up
5918	RARRES1	-1.221738775	0.000289603	0.020626921	Down		yes
23197	FAF2	1.25799097	0.000290235	0.020626921	Up
6574	SLC20A1	1.268980612	0.000293278	0.020722732	Up
54	ACP5	1.247348327	0.000301175	0.021158375	Up
23500	DAAM2	1.218299144	0.0003118	0.021658699	Up
8406	SRPX	1.210682308	0.000317711	0.021818521	Up
6935	ZEB1	1.223992813	0.000326906	0.021904825	Up
83483	PLVAP	1.23636626	0.000330344	0.021904825	Up
85352	KIAA1644	1.378968033	0.000331738	0.021904825	Up
9692	KIAA0391	1.210207636	0.00033437	0.021904825	Up
81029	WNT5B	1.238978065	0.000335095	0.021904825	Up
1909	EDNRA	1.218852209	0.000338587	0.021913776	Up
8645	KCNK5	-1.225846987	0.000343317	0.02208795	Down		yes
2348	FOLR1	-1.21482204	0.000354504	0.022570057	Down		yes
51208	CLDN18	-1.195464312	0.000359358	0.022739633	Down		yes
1809	DPYSL3	1.232939276	0.000360888	0.022739633	Up
9922	IQSEC1	1.245987117	0.00036607	0.022947903	Up
55279	ZNF654	1.195882633	0.00037467	0.023367186	Up
738	C11orf2	-1.200347484	0.000378359	0.023477448	Down		yes
81575	APOLD1	1.217873578	0.000381681	0.023564004	Up
22836	RHOBTB3	1.217214108	0.000389544	0.023808935	Up
11238	CA5B	1.264406201	0.000392005	0.023840134	Up
10019	SH2B3	1.219820886	0.000411752	0.024532683	Up
3777	KCNK3	-1.258098413	0.000413157	0.024532683	Down		yes
51450	PRRX2	1.198732503	0.000413634	0.024532683	Up
5919	RARRES2	-1.194730896	0.000415434	0.024532683	Down
58487	CREBZF	-1.24492515	0.000424509	0.024948047	Down
2123	EVI2A	1.190737107	0.000431836	0.025188224	Up
64123	ELTD1	1.230095775	0.000433849	0.025188224	Up
3371	TNC	1.288768643	0.000434777	0.025188224	Up
80345	ZSCAN16	-1.168332412	0.000469447	0.026444793	Down
5921	RASA1	1.193057324	0.000486044	0.026881456	Up
57447	NDRG2	-1.220402949	0.000490393	0.026881456	Down
79746	ECHDC3	-1.171026825	0.000495125	0.02701966	Down
5950	RBP4	1.192702024	0.000504154	0.02732048	Up
79812	MMRN2	1.225985312	0.000507428	0.027325089	Up
51063	CALHM2	1.167338659	0.000510462	0.027336151	Up
57817	HAMP	-1.210387715	0.000516851	0.027469483	Down
7052	TGM2	-1.179250657	0.000519211	0.027475501	Down
26048	ZNF500	1.179960318	0.000530763	0.027845695	Up
5793	PTPRG	1.176311464	0.000542129	0.028199936	Up
55658	RNF126	-1.183796103	0.000555966	0.028686527	Down
6943	TCF21	-1.207500362	0.000556177	0.028686527	Down
24147	FJX1	1.163238873	0.000588612	0.02997997	Up
9871	SEC24D	1.17895936	0.000602246	0.030547122	Up
177	AGER	-1.143210695	0.000606149	0.030618039	Down
6474	SHOX2	1.173257476	0.000616921	0.030906747	Up
1749	DLX5	1.177595865	0.000629414	0.03140393	Up
5218	CDK14	1.162613484	0.000635049	0.031444148	Up
722	C4BPA	-1.172259017	0.000635365	0.031444148	Down
9228	DLGAP2	1.164108551	0.000651273	0.031844639	Up
6508	SLC4A3	-1.151372064	0.000666604	0.03220892	Down
56951	C5orf15	1.168009669	0.000666628	0.03220892	Up
9189	ZBED1	1.146942339	0.000685735	0.033001689	Up
10484	SEC23A	1.140914612	0.000701862	0.033645324	Up
26873	OPLAH	-1.129841844	0.000710941	0.033947414	Down
7049	TGFBR3	-1.204741524	0.00072197	0.034310264	Down
3620	IDO1	-1.145424296	0.000738449	0.034852521	Down
2055	CLN8	1.238889807	0.000753132	0.0352337	Up
2938	GSTA1	-1.261594325	0.000755173	0.0352337	Down
23367	LARP1	1.128387798	0.000759297	0.035291432	Up
1936	EEF1D	-1.117368148	0.000768886	0.03560174	Down
60681	FKBP10	1.157830779	0.000804621	0.037115782	Up
64718	UNKL	1.139099588	0.000842073	0.038071128	Up
3294	HSD17B2	-1.158796959	0.000845508	0.038071128	Down
26249	KLHL3	1.149344587	0.000847321	0.038071128	Up
8460	TPST1	1.122533066	0.000847568	0.038071128	Up
8673	VAMP8	-1.132979077	0.000851297	0.038071128	Down
9244	CRLF1	1.112702439	0.000852031	0.038071128	Up
4038	LRP4	1.13127425	0.000858761	0.038071128	Up
1755	DMBT1	-1.113459711	0.000859876	0.038071128	Down
54622	ARL15	1.111626274	0.000862705	0.038071128	Up
85453	TSPYL5	-1.120956732	0.000875607	0.038478917	Down
5128	CDK17	1.13150304	0.000878241	0.038478917	Up
216	ALDH1A1	-1.128396112	0.000892657	0.038899034	Down
51302	CYP39A1	-1.109033773	0.000894194	0.038899034	Down
55777	MBD5	1.111360248	0.000902633	0.039126916	Up
54619	CCNJ	-1.111167505	0.000933339	0.040032055	Down
4673	NAP1L1	-1.102494345	0.00094687	0.04018938	Down
55269	PSPC1	1.132096789	0.00095828	0.040393146	Up
8609	KLF7	1.116458189	0.000974549	0.040803313	Up
1293	COL6A3	1.102240772	0.000974686	0.040803313	Up
8323	FZD6	-1.106716805	0.000983288	0.041022897	Down
6533	SLC6A6	1.257823399	0.000993784	0.041319799	Up
92689	FAM114A1	1.123221808	0.001004305	0.041413332	Up
3487	IGFBP4	1.142068383	0.00103459	0.042156079	Up
5922	RASA2	1.092905671	0.001050135	0.042313906	Up
4201	MEA1	-1.102521561	0.001054823	0.042313906	Down
23070	FTSJD2	-1.085681935	0.001055287	0.042313906	Down
6424	SFRP4	1.156480085	0.001058455	0.042313906	Up
57862	ZNF410	1.08759468	0.001059232	0.042313906	Up
11156	PTP4A3	-1.097379984	0.001073444	0.042328318	Down
28952	CCDC22	-1.130628544	0.001088483	0.042783319	Down
51069	MRPL2	-1.08744451	0.001112196	0.04357526	Down
51442	VGLL1	-1.101482538	0.001117458	0.043581014	Down
7068	THRB	1.087124705	0.001119473	0.043581014	Up
54149	C21orf91	-1.077140492	0.001139187	0.044154107	Down
2639	GCDH	-1.092769182	0.001141489	0.044154107	Down
55854	ZC3H15	1.094381534	0.00114503	0.044154107	Up
80267	EDEM3	1.138694382	0.001164969	0.04447486	Up
4193	MDM2	1.096124431	0.00116979	0.04447486	Up
11338	U2AF2	1.106781789	0.001169915	0.04447486	Up
5654	HTRA1	1.104094407	0.00117154	0.04447486	Up
80772	GLTPD1	-1.076422511	0.001201386	0.045146753	Down
1609	DGKQ	-1.071478083	0.001203271	0.045146753	Down
199870	FAM76A	-1.083120384	0.001209467	0.045146753	Down
3043	HBB	1.081731343	0.001211524	0.045146753	Up
8685	MARCO	-1.085042807	0.001212742	0.045146753	Down
57326	PBXIP1	-1.254423669	0.001215092	0.045146753	Down
81873	ARPC5L	-1.125462072	0.001219477	0.045172369	Down
22913	RALY	-1.096036158	0.001243446	0.045782794	Down
1306	COL15A1	1.09707443	0.001257456	0.046159571	Up
5745	PTH1R	1.065191137	0.001283042	0.04678126	Up
2977	GUCY1A2	1.075610678	0.001302094	0.047201265	Up
81501	TM7SF4	1.077073456	0.00130514	0.047201265	Up
56101	PCDHGB5	1.068806157	0.001310857	0.047268197	Up
7041	TGFB1I1	1.07546691	0.001315467	0.047294895	Up
3849	KRT2	1.063998476	0.001323296	0.047298535	Up
6591	SNAI2	1.09853332	0.001323307	0.047298535	Up
5892	RAD51L3	-1.086606948	0.001352368	0.048196355	Down
8499	PPFIA2	1.077219029	0.001367286	0.048391449	Up
26000	TBC1D10B	1.073282237	0.001371308	0.048391449	Up
3426	CFI	-1.161971646	0.001373466	0.048391449	Down
5447	POR	-1.109438901	0.001410828	0.049415378	Down
7040	TGFB1	1.082993402	0.001428589	0.049894481	Up
7542	ZFPL1	-1.082326786	0.001439898	0.050003725	Down
55168	MRPS18A	-1.08725855	0.001445356	0.050051076	Down
1838	DTNB	-1.068246375	0.001457044	0.05031329	Down
2014	EMP3	1.079074933	0.001462576	0.050362058	Up
79635	CCDC121	-1.131149736	0.001478761	0.050511926	Down
5319	PLA2G1B	-1.066998525	0.001479325	0.050511926	Down
6283	S100A12	1.103436604	0.001504667	0.051020314	Up
53405	CLIC5	-1.058663526	0.001523318	0.051349426	Down
285527	FRYL	1.062427709	0.001524856	0.051349426	Up
80761	UPK3B	-1.066927122	0.001571791	0.052496106	Down
10669	CGREF1	1.045775547	0.00161493	0.053789933	Up
10203	CALCRL	1.082393528	0.001620298	0.053822086	Up
79810	PTCD2	1.090200692	0.001648969	0.054522529	Up
27121	DKK4	-1.051825525	0.001650306	0.054522529	Down
1825	DSC3	-1.076348569	0.001655514	0.054547169	Down
902	CCNH	1.035863809	0.00167508	0.054964374	Up
4267	CD99	1.048386691	0.001708688	0.055360642	Up
7827	NPHS2	1.051078552	0.001711905	0.055360642	Up
6199	RPS6KB2	-1.046567399	0.001718455	0.055366435	Down
26011	ODZ4	1.058659742	0.001721142	0.055366435	Up
51290	ERGIC2	1.038628029	0.001763931	0.056193842	Up
55668	C14orf118	1.044973706	0.001773975	0.056324856	Up
55781	RIOK2	1.048009127	0.00178348	0.056479932	Up
6925	TCF4	1.033957351	0.001796032	0.056730471	Up
23215	BAT2L2	1.058305626	0.001802116	0.056775945	Up
2037	EPB41L2	1.045627214	0.001811876	0.056936697	Up
794	CALB2	-1.083730304	0.001833422	0.057466022	Down
2041	EPHA1	-1.038593168	0.001844162	0.057654595	Down
125	ADH1B	-1.029219456	0.001854809	0.057692598	Down
1404	HAPLN1	1.054902024	0.001876822	0.058022638	Up
273	AMPH	1.032992279	0.001883449	0.058022638	Up
10808	HSPH1	1.022727023	0.00188585	0.058022638	Up
634	CEACAM1	-1.032163393	0.001889153	0.058022638	Down
10555	AGPAT2	-1.061478453	0.001927479	0.059051401	Down
4192	MDK	-1.060753012	0.001975855	0.059999671	Down
23412	COMMD3	1.026042532	0.001987097	0.060057042	Up
2170	FABP3	-1.059116929	0.002004521	0.060333869	Down
2745	GLRX	1.184484602	0.002008826	0.060333869	Up
140	ADORA3	1.039233755	0.002019925	0.060518548	Up
165	AEBP1	1.042236289	0.002038042	0.060912044	Up
825	CAPN3	-1.017550524	0.002049582	0.061107544	Down
79070	KDELC1	1.064415531	0.002070981	0.061595301	Up
445	ASS1	-1.018071261	0.00208266	0.061792309	Down
9638	FEZ1	1.011035498	0.002103979	0.062162679	Up
3344	FOXN2	1.029735749	0.002110399	0.062162679	Up
79646	PANK3	1.034744391	0.00211739	0.06221868	Up
54726	OTUD4	1.012271101	0.002140085	0.06273478	Up
996	CDC27	1.023184721	0.00215235	0.062943369	Up
1843	DUSP1	1.024640713	0.002175928	0.063329852	Up
8687	KRT38	1.024365573	0.002192617	0.063424893	Up
25928	SOSTDC1	-1.01229055	0.002195278	0.063424893	Down
79888	LPCAT1	-1.010200598	0.00219952	0.063424893	Down
717	C2	-1.012824681	0.002202581	0.063424893	Down
3960	LGALS4	-1.073852556	0.002212953	0.063424893	Down
23451	SF3B1	1.034805823	0.00225119	0.064119013	Up
11254	SLC6A14	-1.057623139	0.00225663	0.064119013	Down
1161	ERCC8	1.011990285	0.002261449	0.064119013	Up
80254	CEP63	1.038448758	0.002265986	0.064119013	Up
3654	IRAK1	-1.006184177	0.00227931	0.064122698	Down
22835	ZFP30	-1.010562392	0.002305852	0.064185544	Down
9672	SDC3	-1.033171542	0.002316314	0.064185544	Down
7356	SCGB1A1	-1.031606688	0.002320845	0.064185544	Down
114908	TMEM123	-1.015370276	0.002341805	0.064473476	Down
7456	WIPF1	1.022424031	0.002352556	0.064623907	Up
51704	GPRC5B	-1.004098144	0.002377383	0.065159477	Down
1130	LYST	1.218757313	0.002409379	0.065888712	Up
7204	TRIO	1.005370603	0.002417379	0.065913566	Up
79630	C1orf54	1.011236895	0.002460033	0.066323604	Up
55240	STEAP3	-1.025176427	0.002460486	0.066323604	Down
57333	RCN3	1.008135779	0.002501233	0.066612356	Up
23086	EXPH5	-1.016958049	0.002524999	0.067099116	Down
4811	NID1	0.996162676	0.002546068	0.067376788	Up
1545	CYP1B1	1.004119894	0.00259348	0.068313243	Up
411	ARSB	0.998487288	0.002593813	0.068313243	Up
23062	GGA2	-0.996916566	0.002602843	0.068313243	Down
7094	TLN1	1.013638012	0.002631858	0.068890439	Up
9538	EI24	-1.02096466	0.00265275	0.069083113	Down
55454	CSGALNACT2	0.985557645	0.002658526	0.069083113	Up
394	ARHGAP5	-1.002690838	0.002667476	0.069083113	Down
6910	TBX5	-1.423250441	0.002722876	0.069828236	Down
4023	LPL	0.997843769	0.002770683	0.070585444	Up
4616	GADD45B	0.998344483	0.002785601	0.070645625	Up
6480	ST6GAL1	-1.006889962	0.002799553	0.070852452	Down
22928	SEPHS2	-0.997632846	0.002837516	0.071581254	Down
1160	CKMT2	-1.345051659	0.002840061	0.071581254	Down
5121	PCP4	-0.984873964	0.002876428	0.07234867	Down
56521	DNAJC12	1.018067979	0.002892161	0.072576117	Up
89944	GLB1L2	-1.011285059	0.002932299	0.073180745	Down
79875	THSD4	0.995837937	0.002943686	0.073180745	Up
3131	HLF	-0.97811794	0.002945429	0.073180745	Down
10725	NFAT5	0.986364448	0.003027069	0.074671124	Up
65997	RASL11B	1.032542141	0.003035958	0.074671124	Up
146057	TTBK2	0.986491723	0.003045364	0.074752079	Up
11174	ADAMTS6	0.998304702	0.003157918	0.076652407	Up
3815	KIT	-0.988169659	0.003160455	0.076652407	Down
23178	PASK	0.993605894	0.003171673	0.076652407	Up
5042	PABPC3	-0.966394826	0.003228779	0.077541432	Down
9818	NUPL1	0.974771044	0.003239358	0.077642954	Up
6915	TBXA2R	0.980582324	0.003253934	0.077778832	Up
7051	TGM1	-1.01652689	0.003259998	0.077778832	Down
3956	LGALS1	0.970292952	0.003264115	0.077778832	Up
116138	KLHDC3	-0.966564292	0.003291929	0.077840843	Down
56252	YLPM1	0.982710697	0.003292842	0.077840843	Up
79621	RNASEH2B	0.962276431	0.003295281	0.077840843	Up
8697	CDC23	0.9894885	0.003303154	0.077840843	Up
8811	GALR2	-0.975311539	0.003310793	0.077840843	Down
1829	DSG2	-0.988168577	0.003311292	0.077840843	Down
5965	RECQL	0.977923663	0.003342387	0.078421005	Up
64919	BCL11B	-0.996079137	0.003357341	0.078620947	Down
57205	ATP10D	0.975242547	0.003424638	0.079621625	Up
5655	KLK10	-1.290242953	0.003438775	0.079689812	Down
7005	TEAD3	-0.967274173	0.003442099	0.079689812	Down
10168	ZNF197	0.982684607	0.003450913	0.079742828	Up
8848	TSC22D1	0.992025299	0.003532226	0.081292502	Up
10365	KLF2	0.965993137	0.003537677	0.081292502	Up
51278	IER5	0.960919584	0.003537939	0.081292502	Up
8218	CLTCL1	0.961962072	0.003565815	0.081398645	Up
6903	TBCC	-0.972209468	0.003569181	0.081398645	Down
153	ADRB1	-0.981156232	0.003609213	0.082011849	Down
8615	USO1	0.978507738	0.003614287	0.082011849	Up
10699	CORIN	0.961457012	0.003623446	0.082011849	Up
2295	FOXF2	-0.96505627	0.003629615	0.082011849	Down
6536	SLC6A9	-0.996987036	0.003641007	0.082117479	Down
10325	RRAGB	-0.964866989	0.003665812	0.082265175	Down
6512	SLC1A7	-0.963952339	0.003674469	0.082265175	Down
26037	SIPA1L1	0.990932681	0.003676812	0.082265175	Up
71	ACTG1	0.983210604	0.003681205	0.082265175	Up
23194	FBXL7	0.971123346	0.003709302	0.082591092	Up
64215	DNAJC1	0.987853243	0.003717911	0.082601533	Up
51596	CUTA	-0.949689333	0.003731917	0.082601533	Down
51720	UIMC1	0.99342133	0.003736147	0.082601533	Up
30	ACAA1	-0.961489172	0.0037368	0.082601533	Down
55144	LRRC8D	-0.954707838	0.003762716	0.082916557	Down
9697	TRAM2	0.945838201	0.003775068	0.08299718	Up
55585	UBE2Q1	-0.950125507	0.003821531	0.083608756	Down
5324	PLAG1	-1.12975633	0.003825187	0.083608756	Down
55957	LIN37	-0.962858992	0.003830244	0.083608756	Down
9194	SLC16A7	0.987861658	0.003890276	0.084560952	Up
6788	STK3	-0.951454488	0.003894618	0.084560952	Down
79652	TMEM204	0.960417007	0.003935519	0.085267803	Up
157869	C8orf84	-0.958555601	0.003989637	0.085861483	Down
373	TRIM23	0.957699482	0.00400955	0.086138381	Up
2771	GNAI2	0.954525256	0.004040553	0.086595509	Up
27255	CNTN6	-0.95489904	0.004044996	0.086595509	Down
2781	GNAZ	-0.95669011	0.004122517	0.088100777	Down
4212	MEIS2	-1.057933293	0.004159415	0.088692107	Down
7504	XK	-0.993462404	0.004201972	0.089330262	Down
7453	WARS	-0.949853196	0.004327265	0.091490394	Down
5997	RGS2	1.093009767	0.004333519	0.091490394	Up
63923	TNN	0.94989303	0.004406288	0.092666313	Up
9025	RNF8	-0.94313921	0.00441196	0.092666313	Down
8744	TNFSF9	0.931437173	0.004443972	0.093178575	Up
3142	HLX	0.936498468	0.004468654	0.093535666	Up
23231	SEL1L3	-0.954828724	0.004490245	0.093666814	Down
26002	MOXD1	-0.951285385	0.004511371	0.093801877	Down
5699	PSMB10	-0.948347949	0.004512067	0.093801877	Down
91851	CHRDL1	-1.070962324	0.004536603	0.093875922	Down
1758	DMP1	0.924796443	0.004558349	0.093875922	Up
2267	FGL1	0.952622235	0.004585469	0.093875922	Up
1373	CPS1	0.958892976	0.004587051	0.093875922	Up
7754	ZNF204P	-0.945673023	0.004594188	0.093875922	Down
3751	KCND2	-0.940367813	0.004599277	0.093875922	Down
1471	CST3	0.941111071	0.00463232	0.094375792	Up
7032	TFF2	-0.921379139	0.004705711	0.095368407	Down
9849	ZNF518A	-0.963333762	0.004718313	0.095368407	Down
51001	MTERFD1	-0.950110686	0.00472005	0.095368407	Down
13	AADAC	-1.249675355	0.004737733	0.095567736	Down
78991	PCYOX1L	0.931093045	0.004755514	0.095610852	Up
10005	ACOT8	-0.938627962	0.004782826	0.096002077	Down
65987	KCTD14	-0.931026919	0.004793286	0.096054309	Down
8733	GPAA1	-0.921329998	0.004836537	0.096762405	Down
1719	DHFR	0.975517694	0.004866726	0.097048715	Up
400506	C16orf88	1.006202086	0.004916594	0.097705608	Up
54566	EPB41L4B	-0.949637631	0.004923646	0.097705608	Down
63894	VIPAR	0.953790801	0.004940921	0.097889502	Up
10653	SPINT2	-0.920646971	0.004977804	0.098413439	Down
290	ANPEP	1.075298607	0.004989169	0.098413439	Up
83716	CRISPLD2	0.949096209	0.004991519	0.098413439	Up
11010	GLIPR1	0.925080687	0.005010666	0.098631847	Up
2746	GLUD1	0.919483953	0.005026364	0.098781792	Up
51176	LEF1	0.932136439	0.005059528	0.099270926	Up
3915	LAMC1	0.915618758	0.005067495	0.099270926	Up
23250	ATP11A	-0.926231557	0.005093774	0.099626071	Down
64866	CDCP1	-0.920843077	0.005113908	0.099780536	Down
2734	GLG1	0.920327105	0.005117997	0.099780536	Up
2327	FMO2	-0.910352466	0.005142049	0.100056243	Down
217	ALDH2	-0.921839064	0.005148509	0.100056243	Down
60343	FAM3A	-0.933821269	0.005188076	0.10026813	Down
11214	AKAP13	0.972008958	0.005191024	0.10026813	Up
253782	LASS6	0.914506719	0.005192222	0.10026813	Up
682	BSG	-0.91995241	0.005283351	0.101274986	Down
53919	SLCO1C1	0.927482789	0.005285785	0.101274986	Up
8036	SHOC2	0.913447227	0.005297582	0.101333242	Up
57665	RDH14	-0.934030343	0.005335955	0.101333242	Down
9792	SERTAD2	0.914863438	0.005338564	0.101333242	Up
57175	CORO1B	-0.914846878	0.005388276	0.101960194	Down
25859	PART1	-0.921431275	0.005411057	0.102098902	Down
64108	RTP4	-0.905275389	0.005412311	0.102098902	Down
9533	POLR1C	-0.932015662	0.005427428	0.102122488	Down
10256	CNKSR1	-0.919529046	0.005440905	0.102122488	Down
3249	HPN	-0.92690729	0.005454687	0.102122488	Down
3705	ITPK1	0.910482761	0.005460073	0.102122488	Up
54875	CNTLN	0.917666073	0.005463687	0.102122488	Up
5064	PALM	0.925332742	0.005489401	0.102290305	Up
80177	MYCT1	0.936771667	0.005497813	0.102291117	Up
55905	RNF114	-0.904449126	0.005530498	0.102577469	Down
79807	GSTCD	0.911104263	0.005577302	0.102948425	Up
8900	CCNA1	-0.937878053	0.005583672	0.102948425	Down
65996	MGC2752	0.913820728	0.005609922	0.103276638	Up
4750	NEK1	0.906195124	0.005653262	0.103918014	Up
2523	FUT1	-0.933687302	0.005771096	0.10536322	Down
7984	ARHGEF5	-0.922982989	0.005824425	0.105949063	Down
55204	GOLPH3L	-0.902047518	0.005863078	0.106178167	Down
4331	MNAT1	0.91182609	0.005893134	0.106490624	Up
23007	PLCH1	-0.896490245	0.005897755	0.106490624	Down
60509	AGBL5	-0.898576106	0.005962369	0.10736974	Down
23304	UBR2	-0.909515954	0.00596401	0.10736974	Down
56659	KCNK13	-0.937578199	0.006021482	0.108086045	Down
6505	SLC1A1	-0.892656748	0.006038105	0.108225504	Down
24	ABCA4	-0.910662213	0.006050659	0.108291733	Down
3839	KPNA3	0.897571171	0.006066303	0.108412996	Up
56983	POGLUT1	0.895299982	0.006101576	0.108884179	Up
1080	CFTR	-0.998106496	0.006135565	0.108944133	Down
2524	FUT2	-0.899021725	0.006140585	0.108944133	Down
26032	SUSD5	0.908368998	0.006185365	0.109426319	Up
285755	PPIL6	-0.890276584	0.006194575	0.109426319	Down
84656	GLYR1	0.893011629	0.00620357	0.109426319	Up
8540	AGPS	0.897242522	0.006244154	0.109667438	Up
57419	SLC24A3	-0.896403853	0.006279468	0.109748924	Down
50626	CYHR1	-0.894967823	0.00628796	0.109748924	Down
8572	PDLIM4	0.944870952	0.006293684	0.109748924	Up
80148	PQLC1	-0.901428274	0.006372689	0.110811065	Down
50856	CLEC4A	0.892104753	0.006482219	0.112395233	Up
23408	SIRT5	-0.897613227	0.006525943	0.11299309	Down
2615	LRRC32	0.884998667	0.006662685	0.114405649	Up
4211	MEIS1	-0.880785095	0.006667258	0.114405649	Down
5710	PSMD4	-0.903432379	0.006671603	0.114405649	Down
5731	PTGER1	-0.907550506	0.006673039	0.114405649	Down
23012	STK38L	0.889320345	0.006713154	0.114651797	Up
3670	ISL1	0.895349909	0.006713919	0.114651797	Up
5822	PWP2	-0.891835977	0.006731078	0.114651797	Down
64699	TMPRSS3	-0.883341781	0.006742092	0.114651797	Down
475	ATOX1	0.908719545	0.006754369	0.114674177	Up
6296	ACSM3	-0.884039283	0.006809564	0.115291009	Down
80775	TMEM177	-0.912654646	0.006864164	0.115894388	Down
50810	HDGFRP3	0.876986607	0.006898747	0.116046809	Up
8558	CDK10	-0.889685339	0.006901671	0.116046809	Down
5608	MAP2K6	0.920630996	0.006947589	0.116522436	Up
5119	CHMP1A	-0.894788399	0.006968141	0.116678294	Down
8892	EIF2B2	0.876924402	0.00698301	0.116678294	Up
7869	SEMA3B	-0.889738593	0.007004939	0.116678294	Down
6362	CCL18	-0.880875798	0.007016496	0.116693397	Down
5175	PECAM1	0.965792906	0.00704177	0.116954616	Up
6041	RNASEL	0.879888231	0.00710849	0.117902551	Up
80071	CCDC15	0.875483741	0.007123423	0.117990135	Up
79603	LASS4	-0.888669432	0.007197493	0.118792019	Down
9701	PPP6R2	-0.919238523	0.007210707	0.118792019	Down
11187	PKP3	-0.872290143	0.007286839	0.119567711	Down
10609	LEPREL4	0.895887259	0.007300935	0.119567711	Up
4047	LSS	-0.882756632	0.007306698	0.119567711	Down
8546	AP3B1	0.869772396	0.007325509	0.119715268	Up
4283	CXCL9	-0.874329702	0.007357294	0.119754413	Down
55034	MOCOS	-0.921778132	0.007434367	0.120739075	Down
11152	WDR45	-0.925956749	0.007458442	0.120739075	Down
2638	GC	0.917123148	0.007481662	0.120739075	Up
11092	C9orf9	-0.881791689	0.007490372	0.120739075	Down
26099	C1orf144	0.876433273	0.007503327	0.120739075	Up
213	ALB	0.888990722	0.007505396	0.120739075	Up
5211	PFKL	-0.866639518	0.007511799	0.120739075	Down
7539	ZFP37	0.931856701	0.007521944	0.120739075	Up
4628	MYH10	-0.87923512	0.007537095	0.120751569	Down
5261	PHKG2	-0.870128746	0.00759789	0.121407332	Down
336	APOA2	0.917212973	0.007663011	0.122288058	Up
5947	RBP1	-0.876790648	0.007740858	0.12303619	Down
10994	ILVBL	-0.896010943	0.007750153	0.12303619	Down
53358	SHC3	-0.883917988	0.00778074	0.123042385	Down
79026	AHNAK	0.913790212	0.007813349	0.123315387	Up
56548	CHST7	0.929405773	0.007828267	0.123315387	Up
10001	MED6	0.873639599	0.00785618	0.123489854	Up
51604	PIGT	0.864578916	0.007897767	0.123489854	Up
257152	LOC257152	-0.875919342	0.007902847	0.123489854	Down
819	CAMLG	0.870623993	0.007904154	0.123489854	Up
27065	D4S234E	-0.868364953	0.00795703	0.124023113	Down
9337	CNOT8	0.930189824	0.007964508	0.124023113	Up
64222	TOR3A	-0.885906466	0.0079858	0.124120797	Down
23569	PADI4	0.899114439	0.008001925	0.124120797	Up
11137	PWP1	0.870500482	0.008010768	0.124120797	Up
29093	MRPL22	0.859106098	0.008019039	0.124120797	Up
55002	TMCO3	0.860906803	0.00802155	0.124120797	Up
81932	HDHD3	-0.872259681	0.008046928	0.124151235	Down
9586	CREB5	0.868476007	0.008075126	0.124320331	Up
1998	ELF2	0.886564383	0.008096527	0.124383359	Up
10605	PAIP1	-0.892162946	0.008099571	0.124383359	Down
4060	LUM	0.868624374	0.008312189	0.126774833	Up
4624	MYH6	-0.892594915	0.008317524	0.126774833	Down
648	BMI1	0.902588038	0.008338193	0.126931591	Up
2308	FOXO1	0.861048474	0.008377055	0.127206365	Up
2353	FOS	0.865062654	0.008433851	0.127751425	Up
9377	COX5A	-0.884661605	0.008445834	0.127774595	Down
65989	DLK2	-0.898338718	0.008464244	0.127894833	Down
1952	CELSR2	-0.870494284	0.008495063	0.127899677	Down
3170	FOXA2	-0.851614046	0.008495954	0.127899677	Down
9422	ZNF264	0.866341533	0.008512386	0.127952391	Up
7490	WT1	-0.95936056	0.00852039	0.127952391	Down
7508	XPC	0.864330723	0.008537063	0.128045473	Up
124044	SPATA2L	-0.886077101	0.008606115	0.128583097	Down
54665	RSBN1	-0.889969116	0.008621708	0.128583097	Down
8630	HSD17B6	-0.862658354	0.00862177	0.128583097	Down
80349	WDR61	0.862930409	0.008636819	0.128583097	Up
376412	RNF126P1	-0.859539347	0.008641362	0.128583097	Down
396	ARHGDIA	0.866902753	0.008657059	0.128583097	Up
58985	IL22RA1	-0.871712131	0.008698472	0.128668698	Down
51406	NOL7	-0.851810788	0.008707746	0.128668698	Down
5825	ABCD3	-0.860170622	0.00870785	0.128668698	Down
7080	NKX2-1	-0.859880798	0.008721072	0.128668698	Down
29893	PSMC3IP	0.865992329	0.008725978	0.128668698	Up
249	ALPL	0.849872752	0.008801972	0.129350855	Up
11146	GLMN	-0.863974498	0.008803985	0.129350855	Down
55325	UFSP2	0.863627768	0.008817436	0.129392958	Up
22918	CD93	0.886924267	0.008830326	0.129426752	Up
27286	SRPX2	0.864265246	0.008865773	0.129660681	Up
11019	LIAS	0.869886922	0.008897641	0.129945955	Up
9093	DNAJA3	0.845905425	0.009018054	0.131463534	Up
7001	PRDX2	-0.857137096	0.009054703	0.131544485	Down
25818	KLK5	-0.949779449	0.009060901	0.131544485	Down
4643	MYO1E	0.854277712	0.009080143	0.13166746	Up
9254	CACNA2D2	-0.846788466	0.009105953	0.131885272	Down
79154	DHRS11	-0.937843304	0.009164485	0.132494916	Down
2960	GTF2E1	0.846200708	0.009169723	0.132494916	Up
9524	TECR	-0.872213394	0.009355168	0.134696795	Down
51289	RXFP3	-0.847599781	0.009439704	0.135754042	Down
51299	NRN1	0.851705926	0.009481414	0.136193663	Up
4324	MMP15	-0.840936165	0.009538108	0.136686788	Down
51542	VPS54	-0.844175688	0.00956158	0.136803786	Down
1734	DIO2	0.862555212	0.009643303	0.137278772	Up
27252	KLHL20	0.860049734	0.009682573	0.137278772	Up
51371	POMP	0.851698862	0.009699113	0.137278772	Up
285672	SREK1IP1	0.862186776	0.009702907	0.137278772	Up
56034	PDGFC	0.861573092	0.00970295	0.137278772	Up
1039	CDR2	0.854752204	0.009729804	0.137444865	Up
60559	SPCS3	0.854873269	0.009772485	0.137444865	Up
80321	CEP70	-0.837834714	0.009772511	0.137444865	Down
9448	MAP4K4	0.850461083	0.009782951	0.137444865	Up
3660	IRF2	0.836630177	0.009833871	0.137707003	Up
5225	PGC	-0.850648667	0.009834605	0.137707003	Down
3195	TLX1	0.864189543	0.009855459	0.13784111	Up
2004	ELK3	0.840033165	0.009947073	0.138409949	Up
1824	DSC2	-0.837897934	0.009952744	0.138409949	Down
8451	CUL4A	0.877267719	0.01001841	0.139164821	Up
4795	NFKBIL1	-0.834034902	0.010122322	0.14013053	Down
867	CBL	0.861801467	0.010149604	0.140349279	Up
5371	PML	-0.862306589	0.010173496	0.140520692	Down
58528	RRAGD	-0.839200907	0.010218756	0.140986538	Down
10232	MSLN	-0.860849791	0.010262292	0.141226009	Down
11022	TDRKH	-0.922580254	0.010283047	0.141226009	Down
156	ADRBK1	-0.844789722	0.010296894	0.141226009	Down
23313	C22orf9	0.879854716	0.010317999	0.141226009	Up
578	BAK1	-0.843210741	0.010323713	0.141226009	Down
5236	PGM1	-0.900551791	0.010328538	0.141226009	Down
2530	FUT8	0.856912887	0.010387822	0.14187792	Up
23175	LPIN1	-0.871218567	0.010432224	0.142222173	Down
10456	HAX1	-0.863582215	0.010445804	0.142222173	Down
1580	CYP4B1	-0.835460626	0.010471213	0.142380538	Down
9517	SPTLC2	0.875906814	0.010588603	0.143497868	Up
7311	UBA52	-0.845204504	0.010644667	0.14396529	Down
79159	NOL12	-0.827673961	0.010655301	0.14396529	Down
51339	DACT1	0.829311755	0.010666442	0.14396529	Up
23729	SHPK	0.849119912	0.01068538	0.144011124	Up
55353	LAPTM4B	-0.826841855	0.010709648	0.144020616	Down
7103	TSPAN8	-0.84038074	0.010756022	0.144315942	Down
3120	HLA-DQB2	-0.842419415	0.010767027	0.144315942	Down
9575	CLOCK	0.825698285	0.010895127	0.145675362	Up
5875	RABGGTA	-0.934363594	0.010904201	0.145675362	Down
8364	HIST1H4C	0.903110899	0.010970677	0.146162119	Up
23368	PPP1R13B	-0.832664395	0.010983772	0.146162119	Down
5095	PCCA	0.856567028	0.010994168	0.146162119	Up
157567	ANKRD46	-0.868049454	0.011061525	0.146814422	Down
84525	HOPX	-0.846159615	0.011082057	0.146927398	Down
79767	ELMO3	-0.825581353	0.011119231	0.147260536	Down
1742	DLG4	0.833155987	0.011135451	0.147315747	Up
10608	MXD4	0.836062545	0.011159411	0.147339309	Up
352961	HCG26	-0.821545891	0.011161338	0.147339309	Down
115207	KCTD12	0.905278829	0.011200017	0.14769041	Up
904	CCNT1	0.826645589	0.011262576	0.148355309	Up
79084	WDR77	-0.877570452	0.011275593	0.1483669	Down
55148	UBR7	0.84434662	0.011370937	0.149128873	Up
9600	PITPNM1	-0.82746064	0.011378739	0.149128873	Down
1577	CYP3A5	-0.82326897	0.011380193	0.149128873	Down
7189	TRAF6	0.849917697	0.0113823	0.149128873	Up
51127	TRIM17	-0.846144692	0.011404659	0.149261837	Down
6597	SMARCA4	-0.821693173	0.011417545	0.149270669	Down
112398	EGLN2	-0.822417426	0.011453808	0.149584771	Down
10915	TCERG1	0.908502085	0.011565501	0.150617875	Up
4134	MAP4	0.831078942	0.011571129	0.150617875	Up
10445	MCRS1	-0.825681707	0.011587995	0.150617875	Down
25854	FAM149A	-0.81620151	0.011603961	0.150617875	Down
2791	GNG11	0.815962002	0.011669382	0.15126885	Up
7078	TIMP3	0.823785132	0.011690387	0.151380603	Up
55244	SLC47A1	-0.848523161	0.011727861	0.151705152	Down
3776	KCNK2	0.820510462	0.011807388	0.152250536	Up
29842	TFCP2L1	-0.855008691	0.011889485	0.152664987	Down
9101	USP8	0.837833306	0.012048108	0.153355296	Up
6521	SLC4A1	0.816363178	0.012054144	0.153355296	Up
2018	EMX2	0.809723887	0.012084689	0.153355296	Up
79413	ZBED2	-0.828605518	0.012088794	0.153355296	Down
4285	MIPEP	0.81194326	0.012101043	0.153355296	Up
6809	STX3	-0.845922598	0.012102733	0.153355296	Down
79007	DBNDD1	-0.818358981	0.012106337	0.153355296	Down
23381	SMG5	-0.810329813	0.012227921	0.154735096	Down
5939	RBMS2	0.820047238	0.012293097	0.155267935	Up
1452	CSNK1A1	0.824853328	0.012308134	0.155267935	Up
5473	PPBP	0.867631868	0.012327852	0.15528363	Up
23107	MRPS27	0.807502097	0.01239366	0.155740252	Up
6712	SPTBN2	-0.805979473	0.012396537	0.155740252	Down
441024	MTHFD2L	-0.820179033	0.012446448	0.156206756	Down
3269	HRH1	0.812241182	0.012483843	0.156295546	Up
93643	TJAP1	-0.826488218	0.012522787	0.156295546	Down
383	ARG1	0.814293407	0.012525687	0.156295546	Up
1965	EIF2S1	0.848017557	0.012528865	0.156295546	Up
27230	SERP1	-0.824864775	0.012530238	0.156295546	Down
27314	RAB30	-0.806127925	0.012580522	0.156762799	Down
51352	WT1-AS	-1.116995026	0.012639257	0.157334299	Down
10557	RPP38	-0.810798667	0.012688668	0.157788681	Down
10742	RAI2	-0.821680164	0.012804475	0.159066974	Down
10326	SIRPB1	0.854267718	0.01283232	0.159251041	Up
51313	FAM198B	0.815340759	0.012871892	0.159270164	Up
2332	FMR1	-0.804253619	0.012875375	0.159270164	Down
3212	HOXB2	0.826095849	0.012885978	0.159270164	Up
51334	PRR16	0.813012483	0.012965221	0.15976498	Up
79589	RNF128	-0.800792901	0.013057704	0.160580854	Down
80305	TRABD	-0.811292178	0.013094332	0.160869459	Down
1436	CSF1R	0.817974508	0.013117518	0.160869541	Up
51283	BFAR	0.806653685	0.013120659	0.160869541	Up
8832	CD84	0.801567576	0.013151835	0.161090216	Up
230	ALDOC	-0.832931131	0.013349228	0.163117711	Down
1327	COX4I1	-0.824432443	0.013373833	0.163155419	Down
590	BCHE	-0.818258438	0.013471919	0.163716377	Down
79137	FAM134A	-0.818255105	0.0134746	0.163716377	Down
3123	HLA-DRB1	-0.800965905	0.013485859	0.163716377	Down
4978	OPCML	0.801464398	0.013601437	0.164065612	Up
7156	TOP3A	0.799433099	0.013603072	0.164065612	Up
2063	NR2F6	-0.80770001	0.01361226	0.164065612	Down
728	C5AR1	0.808256542	0.013621358	0.164065612	Up
10446	LRRN2	-0.794791931	0.013622922	0.164065612	Down
91746	YTHDC1	0.812130259	0.013673633	0.164514265	Up
27098	CLUL1	-0.905329064	0.013731174	0.165044125	Down
7593	MZF1	0.804508363	0.013744977	0.165047744	Up
9844	ELMO1	0.802194795	0.013790964	0.16517294	Up
5435	POLR2F	-0.795647108	0.013801794	0.16517294	Down
1200	TPP1	0.794317771	0.013802657	0.16517294	Up
92822	ZNF276	-0.79868057	0.013933712	0.166333691	Down
51128	SAR1B	0.808203509	0.013949356	0.166357984	Up
1054	CEBPG	-0.794138595	0.013969405	0.166434703	Down
10481	HOXB13	0.803448974	0.013990766	0.166526898	Up
4804	NGFR	0.813003624	0.014031058	0.16670905	Up
140801	RPL10L	-0.868091527	0.014046629	0.16670905	Down
33	ACADL	-0.7965431	0.014064987	0.16670905	Down
11202	KLK8	-0.927303199	0.014085623	0.16670905	Down
55520	ELAC1	-0.793748889	0.014160379	0.167221701	Down
4232	MEST	-0.793113419	0.01416774	0.167221701	Down
55819	RNF130	0.795410447	0.014183098	0.167221701	Up
6701	SPRR2B	-0.821765059	0.01418668	0.167221701	Down
55294	FBXW7	0.790239649	0.0142348	0.167221701	Up
27344	PCSK1N	-0.799995317	0.014243439	0.167221701	Down
7392	USF2	-0.827657337	0.014259628	0.167221701	Down
7982	ST7	0.797718424	0.014298937	0.167221701	Up
9732	DOCK4	0.794178369	0.014303704	0.167221701	Up
6320	CLEC11A	0.803866114	0.014372516	0.167786678	Up
1036	CDO1	0.791828616	0.014384853	0.167786678	Up
7429	VIL1	-0.792234119	0.014416754	0.16799848	Down
8383	OR1A1	0.797767916	0.014440339	0.168113047	Up
10866	HCP5	-0.798319702	0.0144753	0.168359722	Down
51327	AHSP	0.788416792	0.014526457	0.168527581	Up
80011	FAM192A	0.788657936	0.014531092	0.168527581	Up
64864	RFX7	0.823314317	0.014645344	0.169370561	Up
29078	NDUFAF4	-0.78775175	0.014663354	0.169389981	Down
11177	BAZ1A	0.788034237	0.014697589	0.169389981	Up
6839	SUV39H1	-0.80022514	0.014706566	0.169389981	Down
64078	SLC28A3	-0.824096154	0.014760722	0.169581824	Down
3920	LAMP2	-0.786600701	0.014806399	0.16962832	Down
66036	MTMR9	0.790237863	0.014884277	0.170201494	Up
1340	COX6B1	-0.818345936	0.014959202	0.170579553	Down
2001	ELF5	-0.794378259	0.015010132	0.171000796	Down
92017	SNX29	0.790255941	0.015116189	0.171888646	Up
11127	KIF3A	0.788016561	0.015133081	0.171920802	Up
2861	GPR37	-0.788322572	0.015230526	0.172832059	Down
50834	TAS2R1	0.78522487	0.015241571	0.172832059	Up
4597	MVD	-0.794322662	0.015274241	0.173042009	Down
7480	WNT10B	0.791764976	0.015439343	0.174597471	Up
5187	PER1	0.781147767	0.015440107	0.174597471	Up
80063	ATF7IP2	-0.785733318	0.015477396	0.174697779	Down
64063	PRSS22	-0.794470162	0.015494947	0.174697779	Down
4238	MFAP3	0.801445436	0.01549631	0.174697779	Up
9950	GOLGA5	0.780231613	0.015506143	0.174697779	Up
55885	LMO3	-0.793376787	0.015585532	0.175305102	Down
5412	UBL3	0.801011437	0.015588731	0.175305102	Up
1108	CHD4	0.920959097	0.015621932	0.17546073	Up
8877	SPHK1	0.786948801	0.015631277	0.17546073	Up
23528	ZNF281	0.793960903	0.015856543	0.177663046	Up
23471	TRAM1	-0.778789057	0.01587436	0.177699794	Down
3852	KRT5	-0.835870174	0.01596628	0.178228128	Down
28978	TMEM14A	-0.828657275	0.015974608	0.178228128	Down
55069	C7orf42	-0.776010967	0.015995838	0.178228128	Down
1857	DVL3	-0.783222818	0.016013288	0.178228128	Down
8642	DCHS1	0.784455725	0.016023618	0.178228128	Up
6879	TAF7	0.781655808	0.016054191	0.178405846	Up
54874	FNBP1L	-0.782815817	0.016119593	0.178969941	Down
5298	PI4KB	-0.789007453	0.016210862	0.17965691	Down
78992	YIPF2	-0.85252028	0.016234102	0.179727917	Down
81576	CCDC130	-0.776125953	0.016281956	0.179727917	Down
9482	STX8	0.813386043	0.016285655	0.179727917	Up
1635	DCTD	0.7764523	0.016290783	0.179727917	Up
5201	PFDN1	0.776290907	0.016379444	0.18032596	Up
79188	TMEM43	0.79183724	0.016403998	0.18032596	Up
8128	ST8SIA2	-0.781691854	0.016455169	0.180550503	Down
5670	PSG2	0.797936605	0.016468735	0.180550503	Up
10602	CDC42EP3	0.804621041	0.016484666	0.180563224	Up
10648	SCGB1D1	-0.805910527	0.016512979	0.180617346	Down
57149	LYRM1	-0.781677159	0.016522001	0.180617346	Down
1672	DEFB1	-0.876559928	0.016666751	0.181401453	Down
23029	RBM34	0.779679763	0.01667446	0.181401453	Up
2675	GFRA2	0.779862567	0.016732743	0.181531296	Up
7007	TECTA	-0.799757845	0.016735163	0.181531296	Down
3600	IL15	-0.782073515	0.016736401	0.181531296	Down
26747	NUFIP1	0.787198759	0.016755098	0.181572977	Up
57030	SLC17A7	0.777377854	0.016775348	0.181585556	Up
27013	C2orf24	-0.815026736	0.016785968	0.181585556	Down
79902	NUP85	0.79309915	0.016876509	0.182023194	Up
3690	ITGB3	0.772825389	0.016886221	0.182023194	Up
11282	MGAT4B	-0.767703835	0.016902373	0.182023194	Down
8976	WASL	0.775182274	0.016910472	0.182023194	Up
79092	CARD14	-0.819990358	0.016932139	0.182023194	Down
23130	ATG2A	-0.784609654	0.016968748	0.18207861	Down
56888	KCMF1	-0.793717302	0.016980499	0.18207861	Down
10099	TSPAN3	-0.767652821	0.016998667	0.182113677	Down
6891	TAP2	-0.788705985	0.017040626	0.182403339	Down
23054	NCOA6	-0.77298877	0.017093087	0.182645013	Down
2735	GLI1	0.772007313	0.017131884	0.182746212	Up
7481	WNT11	-0.77054473	0.017132457	0.182746212	Down
23307	FKBP15	0.805290814	0.017220799	0.183049602	Up
4357	MPST	-0.823407329	0.017318435	0.183927494	Down
54531	MIER2	0.789249937	0.017352477	0.184126047	Up
79754	ASB13	-0.764580112	0.017367256	0.184126047	Down
8661	EIF3A	-0.78613051	0.017388352	0.184189962	Down
26289	AK5	0.774042888	0.01744828	0.184504994	Up
7917	BAT3	-0.784877396	0.017583379	0.185457351	Down
58189	WFDC1	0.765147257	0.017593135	0.185457351	Up
11179	ZNF277	0.77714129	0.0176142	0.185457351	Up
23382	AHCYL2	-0.874349721	0.018037773	0.188666017	Down
6819	SULT1C2	-0.767108183	0.018042423	0.188666017	Down
1595	CYP51A1	-0.876862044	0.018062414	0.188713631	Down
2941	GSTA4	-0.815287153	0.018104547	0.188992298	Down
8672	EIF4G3	0.761377338	0.018207947	0.189747607	Up
10169	SERF2	0.767514724	0.018446756	0.191257965	Up
10875	FGL2	-0.775953687	0.018558004	0.191974842	Down
1785	DNM2	-0.777012412	0.018563012	0.191974842	Down
4591	TRIM37	0.76468257	0.018601208	0.192207244	Up
3848	KRT1	0.758553665	0.018716929	0.192582565	Up
55333	SYNJ2BP	0.755549176	0.018731936	0.192582565	Up
1357	CPA1	-0.754478239	0.018732057	0.192582565	Down
1432	MAPK14	-0.76566731	0.018752977	0.192635627	Down
8803	SUCLA2	0.764127949	0.018785867	0.192811451	Up
3490	IGFBP7	0.780992966	0.018886903	0.193496933	Up
140710	C20orf117	0.785093865	0.018900142	0.193496933	Up
415	ARSE	0.75906552	0.019031676	0.194517729	Up
9	NAT1	0.763370895	0.019127359	0.195332359	Up
10533	ATG7	0.783509812	0.019207037	0.195634415	Up
23562	CLDN14	0.751620416	0.019250145	0.195634415	Up
51079	NDUFA13	-0.835148466	0.019257871	0.195634415	Down
344	APOC2	-0.817048976	0.019287687	0.195634415	Down
3824	KLRD1	0.766464412	0.019288438	0.195634415	Up
943	TNFRSF8	-0.753603881	0.019360363	0.195841029	Down
26015	RPAP1	0.835468734	0.019413014	0.196119571	Up
6535	SLC6A8	-0.773814599	0.019472648	0.196287447	Down
55756	INTS9	0.847846099	0.019521219	0.19656292	Up
6426	SRSF1	0.753589224	0.019584232	0.196671232	Up
2632	GBE1	0.759179866	0.01958857	0.196671232	Up
6098	ROS1	-0.759503368	0.019596332	0.196671232	Down
23208	SYT11	0.752262101	0.019786159	0.197892125	Up
29114	TAGLN3	0.759277779	0.019806088	0.197892125	Up
131601	TPRA1	-0.764249131	0.019812426	0.197892125	Down
79094	CHAC1	-0.749798733	0.019831303	0.197892125	Down
9013	TAF1C	-0.756670894	0.019933502	0.198587714	Down
10162	LPCAT3	-0.7706982	0.020128164	0.200253176	Down
150726	FBXO41	-0.762541763	0.020133439	0.200253176	Down
9019	MPZL1	0.754670785	0.020315487	0.201483747	Up
56259	CTNNBL1	-0.75363843	0.020323091	0.201483747	Down
27242	TNFRSF21	-0.749550895	0.020344946	0.201536969	Down
54865	GPATCH4	0.774358426	0.020401009	0.201652381	Up
419	ART3	-0.972501145	0.020402128	0.201652381	Down
11255	HRH3	0.752859347	0.020430276	0.201652381	Up
10513	APPBP2	0.749623429	0.020431903	0.201652381	Up
5393	EXOSC9	0.802005914	0.020478976	0.201883066	Up
1213	CLTC	0.74458814	0.020685676	0.20329854	Up
6432	SRSF7	-0.742232247	0.020693398	0.20329854	Down
9694	TTC35	-0.75303258	0.020705717	0.20329854	Down
780	DDR1	-0.761587158	0.020726888	0.203343081	Down
1859	DYRK1A	-0.744529762	0.020933995	0.205146555	Down
284443	ZNF493	-0.778984071	0.020965581	0.205190763	Down
23593	HEBP2	-0.745338854	0.020999405	0.205297605	Down
55334	SLC39A9	0.739381686	0.021108562	0.205792347	Up
54826	GIN1	0.741199035	0.021128418	0.205792347	Up
27030	MLH3	0.763387989	0.02114028	0.205792347	Up
20	ABCA2	-0.74021623	0.021144894	0.205792347	Down
9414	TJP2	-0.745285708	0.021212044	0.206281641	Down
54499	TMCO1	0.767263959	0.021265301	0.206396946	Up
81605	URM1	0.743111082	0.021275689	0.206396946	Up
6715	SRD5A1	-0.743572011	0.021291439	0.206396946	Down
83700	JAM3	0.751878848	0.021341896	0.206722134	Up
5634	PRPS2	-0.746497198	0.021459673	0.207369993	Down
1476	CSTB	-0.752559567	0.021612692	0.208211108	Down
1717	DHCR7	-0.741805676	0.021616914	0.208211108	Down
84033	OBSCN	-0.751923171	0.02163188	0.208211108	Down
9882	TBC1D4	0.760361715	0.021694168	0.208646353	Up
9957	HS3ST1	-0.747435218	0.021735469	0.208879229	Down
8581	LY6D	-0.748025404	0.021841658	0.209570197	Down
55734	ZFP64	-0.753025206	0.021864243	0.209622356	Down
3814	KISS1	-0.734738124	0.021899088	0.209757521	Down
1134	CHRNA1	0.762336983	0.021927541	0.209757521	Up
23516	SLC39A14	0.748590697	0.021929819	0.209757521	Up
9644	SH3PXD2A	0.775256249	0.022064703	0.210882669	Up
22897	CEP164	-0.762903766	0.022110058	0.210986217	Down
79018	C17orf39	0.745101001	0.022145446	0.210994493	Up
9104	RGN	-0.762490854	0.022265099	0.211311004	Down
6882	TAF11	-0.735599298	0.022392106	0.21153358	Down
55652	SLC48A1	-0.758602732	0.022548194	0.212220293	Down
6752	SSTR2	0.745673478	0.022569985	0.212220293	Up
51004	COQ6	0.736114932	0.022595934	0.212220293	Up
51366	UBR5	-0.730445918	0.022619416	0.212220293	Down
3421	IDH3G	-0.738609007	0.022654943	0.212372722	Down
3158	HMGCS2	0.73216875	0.022711404	0.212738855	Up
1537	CYC1	-0.738870738	0.022804925	0.21328883	Down
22993	HMGXB3	0.744238254	0.022805015	0.21328883	Up
90121	TSR2	-0.739376183	0.02283839	0.213427732	Down
347088	GPR144	0.7415376	0.022854786	0.213427732	Up
1155	TBCB	-0.746506178	0.022934177	0.21385331	Down
9514	GAL3ST1	-0.744367266	0.022954772	0.21385331	Down
200316	APOBEC3F	-0.735645221	0.022957747	0.21385331	Down
1525	CXADR	-0.732370476	0.023095911	0.214181905	Down
22998	LIMCH1	0.732128542	0.02311076	0.214181905	Up
3623	INHA	-0.75181334	0.023170949	0.214360914	Down
9546	APBA3	-0.750170554	0.023182684	0.214360914	Down
2564	GABRE	-0.755384473	0.023238551	0.214715081	Down
55150	C19orf73	-0.747485822	0.023312299	0.215071357	Down
23113	CUL9	-0.744985527	0.023348773	0.215245396	Down
64834	ELOVL1	-0.7585025	0.023375775	0.215331934	Down
9423	NTN1	-0.729506941	0.023461165	0.215793293	Down
8317	CDC7	-0.782670303	0.023514601	0.21594215	Down
9863	MAGI2	-0.768713672	0.023526341	0.21594215	Down
3837	KPNB1	0.731656875	0.023530346	0.21594215	Up
51066	C3orf32	0.754433922	0.023577354	0.216108138	Up
56924	PAK6	-0.724796597	0.023659177	0.216367411	Down
91775	FAM55C	0.755087542	0.023686364	0.216399184	Up
8161	COIL	0.724632118	0.023710315	0.216456228	Up
8266	UBL4A	-0.745976079	0.023748621	0.216644136	Down
3035	HARS	0.753464693	0.023782573	0.216792078	Up
51077	FCF1	0.723887229	0.023802174	0.216809071	Up
64743	WDR13	-0.736975961	0.023841213	0.217002966	Down
10656	KHDRBS3	-0.735903326	0.023967901	0.217818581	Down
4233	MET	-0.744995853	0.024069435	0.217818581	Down
7422	VEGFA	-0.723626386	0.024100422	0.217818581	Down
2920	CXCL2	-0.732074698	0.024103675	0.217818581	Down
7447	VSNL1	-0.785169491	0.024136385	0.217877648	Down
80830	APOL6	-0.73466458	0.024184857	0.218020423	Down
3201	HOXA4	-0.865594617	0.024231612	0.218280935	Down
84908	FAM136A	-0.723333155	0.024280369	0.218559077	Down
4036	LRP2	-0.780514716	0.024402638	0.219021533	Down
6001	RGS10	0.746052868	0.024427604	0.219021533	Up
8623	ASMTL	0.769920069	0.02449721	0.219021533	Up
5621	PRNP	-0.719762816	0.024515837	0.219021533	Down
57608	KIAA1462	0.727792266	0.024524931	0.219021533	Up
3134	HLA-F	-0.73261653	0.024534838	0.219021533	Down
4781	NFIB	-0.72684041	0.024538862	0.219021533	Down
6206	RPS12	-0.722791955	0.024551004	0.219021533	Down
733	C8G	-0.748776867	0.024578226	0.219021533	Down
967	CD63	0.736878181	0.024642096	0.219265293	Up
8405	SPOP	0.728877046	0.024645821	0.219265293	Up
1999	ELF3	-0.73409732	0.024714226	0.219690404	Down
4300	MLLT3	0.850619271	0.024765492	0.219690404	Up
56623	INPP5E	-0.72662	0.024803858	0.219871179	Down
79745	CLIP4	-0.729573723	0.02482313	0.219882565	Down
55630	SLC39A4	-0.732969092	0.025028157	0.221114153	Down
26278	SACS	0.720565835	0.025034418	0.221114153	Up
65264	UBE2Z	0.72398135	0.025034521	0.221114153	Up
80142	PTGES2	-0.75812859	0.025072151	0.221182114	Down
6388	SDF2	0.742278563	0.025078404	0.221182114	Up
5920	RARRES3	-0.722480086	0.025141007	0.22157438	Down
11329	STK38	-0.730258427	0.025194709	0.221887694	Down
25976	TIPARP	0.733288884	0.025212975	0.221888699	Up
28996	HIPK2	-0.731117034	0.025288662	0.222394682	Down
10105	PPIF	-0.726181892	0.025370472	0.222934132	Down
8462	KLF11	-0.747104869	0.025386478	0.222934132	Down
11069	RAPGEF4	0.71721935	0.025417679	0.223047886	Up
23155	CLCC1	-0.817172509	0.025451839	0.223187432	Down
84861	KLHL22	-0.715174497	0.025473757	0.223219499	Down
81555	YIPF5	0.749819273	0.02571516	0.224530082	Up
26059	ERC2	-0.722901348	0.025795931	0.225045495	Down
8419	BFSP2	-0.724465715	0.025926196	0.225888681	Down
5354	PLP1	0.732488233	0.025966835	0.225934147	Up
2354	FOSB	0.722072881	0.02596838	0.225934147	Up
1470	CST2	-0.730998082	0.026071096	0.226505383	Down
56955	MEPE	0.714721453	0.026193958	0.227411179	Up
10817	FRS3	-0.736278248	0.026217346	0.227452684	Down
6443	SGCB	0.76283666	0.02623619	0.227454746	Up
23218	NBEAL2	-0.728508004	0.026450244	0.228933715	Down
1718	DHCR24	-0.715450033	0.02646297	0.228933715	Down
65244	SPATS2	0.724786434	0.026611844	0.230058828	Up
9645	MICAL2	0.717599324	0.026650915	0.230071178	Up
9997	SCO2	-0.766772951	0.02670896	0.230409545	Down
6829	SUPT5H	-0.715046746	0.026748377	0.230586852	Down
123872	LRRC50	-0.720828919	0.026793692	0.230814719	Down
23468	CBX5	0.758222458	0.026817244	0.230854923	Up
135138	PACRG	-0.732107062	0.026925014	0.231619544	Down
144699	FBXL14	-0.732096481	0.027005241	0.231750157	Down
152015	ROPN1B	-0.726052239	0.027035953	0.231750157	Down
23081	KDM4C	-0.734258369	0.027038244	0.231750157	Down
27284	SULT1B1	0.75365773	0.027039289	0.231750157	Up
23261	CAMTA1	-0.71796209	0.027060029	0.231750157	Down
4061	LY6E	-0.749219347	0.027106957	0.231879244	Down
79752	ZFAND1	-0.711419541	0.02724183	0.232607605	Down
29079	MED4	0.810839455	0.027268559	0.232607605	Up
7026	NR2F2	0.714598393	0.027272214	0.232607605	Up
4208	MEF2C	0.713599215	0.027275424	0.232607605	Up
1605	DAG1	-0.776952935	0.027297752	0.232607605	Down
55212	BBS7	0.720127953	0.027309217	0.232607605	Up
9568	GABBR2	-0.716311846	0.027325304	0.232607605	Down
26040	SETBP1	0.720196615	0.027375273	0.232870795	Up
8459	TPST2	0.704823495	0.027475724	0.233001365	Up
57380	MRS2	-0.712170304	0.027479416	0.233001365	Down
54925	ZNF434	0.711677034	0.027481545	0.233001365	Up
5915	RARB	0.712429807	0.027587637	0.23370151	Up
84196	USP48	0.712126139	0.027844531	0.235388344	Up
9973	CCS	-0.738854252	0.027909989	0.23577865	Down
955	ENTPD6	-0.759986235	0.028095973	0.236227076	Down
7402	UTRN	0.715252362	0.028097297	0.236227076	Up
27089	UQCRQ	0.710205176	0.028117151	0.236227076	Up
23746	AIPL1	0.704808971	0.028145482	0.236227076	Up
10654	PMVK	-0.863406855	0.028166722	0.236227076	Down
10417	SPON2	-0.738325064	0.028175644	0.236227076	Down
858	CAV2	-0.768493061	0.028265993	0.236753948	Down
7035	TFPI	0.704911896	0.02846351	0.237662528	Up
2940	GSTA3	-0.72942179	0.028511723	0.237875664	Down
56997	ADCK3	-0.704864868	0.028579888	0.237984026	Down
11095	ADAMTS8	-0.702442917	0.028624162	0.23819044	Down
5905	RANGAP1	-0.702362631	0.028643876	0.238192341	Down
255926	ADAM5P	0.712252629	0.028680172	0.238275635	Up
54487	DGCR8	-0.775305038	0.028704571	0.238275635	Down
6540	SLC6A13	-0.700120237	0.02871237	0.238275635	Down
6473	SHOX	0.708381664	0.028853453	0.239257794	Up
4046	LSP1	0.7166422	0.028872763	0.239257794	Up
1359	CPA3	-0.70904233	0.028889439	0.239257794	Down
406	ARNTL	0.703450911	0.029042863	0.239917996	Up
80307	FER1L4	-0.70418437	0.029054057	0.239917996	Down
8417	STX7	0.699915236	0.029124751	0.240068075	Up
54674	LRRN3	0.719579822	0.029180666	0.240204864	Up
4162	MCAM	0.706972353	0.02921437	0.240204864	Up
10113	PREB	-0.699398536	0.029239597	0.240204864	Down
2099	ESR1	0.699207548	0.029266753	0.240266483	Up
3135	HLA-G	-0.710026987	0.02949475	0.241489499	Down
6338	SCNN1B	-0.732782317	0.029561756	0.241732429	Down
11130	ZWINT	0.791997585	0.029605711	0.241750305	Up
1958	EGR1	0.737232934	0.029662023	0.241938917	Up
79697	C14orf169	0.780877888	0.029721802	0.241938917	Up
5427	POLE2	0.769760492	0.029724094	0.241938917	Up
10397	NDRG1	-0.727105183	0.029886183	0.242719218	Down
54868	TMEM104	0.706363525	0.029946996	0.242719218	Up
1814	DRD3	-0.697478724	0.029980016	0.242719218	Down
6125	RPL5	-0.721777431	0.029982495	0.242719218	Down
2232	FDXR	0.693949283	0.030162335	0.243801119	Up
55225	RAVER2	0.726979313	0.030175973	0.243801119	Up
7741	ZNF187	-0.712892806	0.030205727	0.243880322	Down
27285	TEKT2	-0.693636943	0.030298594	0.244307396	Down
10226	PLIN3	0.703252861	0.030366865	0.244696475	Up
2326	FMO1	-0.727996536	0.030424339	0.244998107	Down
54820	NDE1	0.728665492	0.030454918	0.245082899	Up
860	RUNX2	0.708044771	0.030499116	0.245277098	Up
25821	MTO1	-0.691228868	0.030584101	0.245620391	Down
7287	TULP1	-0.708311538	0.03059226	0.245620391	Down
11180	WDR6	-0.703800522	0.030602082	0.245620391	Down
7525	YES1	-0.691247706	0.030629677	0.24568056	Down
98	ACYP2	-0.698726381	0.030756102	0.246209948	Down
6738	TROVE2	0.701582864	0.030897213	0.24669336	Up
2687	GGT5	0.703689934	0.03093139	0.246697037	Up
22873	DZIP1	0.73167106	0.030938036	0.246697037	Up
27288	RBMXL2	-0.691899232	0.030987735	0.246932248	Down
79016	DDA1	-0.6935664	0.031096872	0.247191143	Down
3773	KCNJ16	-0.711633103	0.031100129	0.247191143	Down
5744	PTHLH	0.697059174	0.031101111	0.247191143	Up
6493	SIM2	-0.702353513	0.031153429	0.247285401	Down
79785	RERGL	-0.714349791	0.031343773	0.248376044	Down
9477	MED20	-0.693951028	0.031458401	0.248745866	Down
53905	DUOX1	-0.701538353	0.031459515	0.248745866	Down
2702	GJA5	-0.702622445	0.031572317	0.249315248	Down
1556	CYP2B7P1	-0.687946919	0.031626061	0.24957842	Down
8745	ADAM23	0.69316033	0.031683129	0.249867464	Up
55179	FAIM	-0.696412186	0.031740873	0.250000279	Down
10274	STAG1	0.734378022	0.031852187	0.25026838	Up
55068	ENOX1	0.686533248	0.031880226	0.25026838	Up
5190	PEX6	-0.695370133	0.031909165	0.25026838	Down
6301	SARS	-0.699276909	0.031929113	0.25026838	Down
9926	LPGAT1	-0.697019458	0.031959174	0.25026838	Down
113178	SCAMP4	-0.69661905	0.032001504	0.250439425	Down
51182	HSPA14	-0.690003625	0.032046974	0.250478117	Down
64324	NSD1	0.711406205	0.03206792	0.250478117	Up
22881	ANKRD6	-0.689829655	0.032101369	0.25054678	Down
9180	OSMR	0.68605389	0.032117703	0.25054678	Up
29968	PSAT1	-0.692736685	0.032249789	0.251256478	Down
5890	RAD51L1	-0.709374096	0.032339484	0.251469041	Down
55805	LRP2BP	0.687240808	0.032464335	0.251469041	Up
8712	PAGE1	-0.70355905	0.032470365	0.251469041	Down
1012	CDH13	0.68896914	0.032740364	0.252660957	Up
9724	UTP14C	0.687146238	0.032760767	0.252660957	Up
100272147	MTCP1NB	-0.684698698	0.032836339	0.252794233	Down
311	ANXA11	-0.720747603	0.032998796	0.253377692	Down
27130	INVS	0.700273146	0.033047816	0.253520656	Up
22983	MAST1	-0.694857758	0.033058894	0.253520656	Down
80227	PAAF1	0.679800691	0.033390949	0.255426133	Up
1795	DOCK3	-0.69726076	0.033416839	0.255464317	Down
1964	EIF1AX	-0.693713053	0.033471263	0.255689838	Down
9623	TCL1B	0.684493159	0.033514201	0.255689838	Up
2313	FLI1	0.689130295	0.033572481	0.255788407	Up
35	ACADS	-0.681807624	0.0335915	0.255788407	Down
10587	TXNRD2	0.692523956	0.033605709	0.255788407	Up
2622	GAS8	-0.703535928	0.03371887	0.256340734	Down
29062	WDR91	-0.686380182	0.033720214	0.256340734	Down
80000	GREB1L	0.686964787	0.033804893	0.256824743	Up
9445	ITM2B	0.68663732	0.033867405	0.256980233	Up
79583	TMEM231	-0.676564307	0.033990753	0.257596381	Down
8038	ADAM12	0.688342703	0.03404099	0.257817265	Up
5098	PCDHGC3	0.685797109	0.034074582	0.257911883	Up
1942	EFNA1	-0.689197158	0.034103223	0.257926515	Down
1602	DACH1	0.687997063	0.034149433	0.257999174	Up
9653	HS2ST1	-0.681148734	0.034209792	0.258172049	Down
51375	SNX7	0.702907347	0.03421684	0.258172049	Up
81888	HYI	-0.6893895	0.034235675	0.258172049	Down
2049	EPHB3	-0.682383863	0.034374619	0.258740978	Down
26580	BSCL2	-0.691873856	0.034454978	0.259026848	Down
827	CAPN6	-0.685427639	0.034555461	0.259267897	Down
4802	NFYC	-0.695890422	0.034718198	0.260205552	Down
51294	PCDH12	0.674933949	0.034783189	0.260320404	Up
8624	PSMG1	-0.685302282	0.034794578	0.260320404	Down
6564	SLC15A1	-0.678333292	0.03479741	0.260320404	Down
2206	MS4A2	-0.688978614	0.034890343	0.260709718	Down
3622	ING2	0.673196958	0.034919964	0.260709718	Up
55023	PHIP	-0.687204974	0.034941082	0.260709718	Down
54780	NSMCE4A	-0.707322211	0.035119082	0.261765646	Down
29911	HOOK2	-0.686893158	0.035311431	0.262718768	Down
5066	PAM	0.92252139	0.035370853	0.262783743	Up
80215	C21orf96	0.675862392	0.035371758	0.262783743	Up
1620	DBC1	-0.674903982	0.035499991	0.263070307	Down
4674	NAP1L2	-0.701753441	0.035606595	0.263631142	Down
1519	CTSO	0.6777662	0.035679752	0.264012885	Up
55119	PRPF38B	-0.673248913	0.03571068	0.264081886	Down
23300	ATMIN	-0.686675915	0.035924459	0.265013906	Down
6515	SLC2A3	0.687075664	0.035944404	0.265013906	Up
5073	PARN	0.669338931	0.035973452	0.265013906	Up
7405	UVRAG	-0.671696538	0.036175717	0.265912183	Down
3062	HCRTR2	0.67433989	0.036201438	0.265941331	Up
4190	MDH1	-0.68351785	0.036246567	0.266112937	Down
57473	ZNF512B	-0.762785377	0.036350154	0.266603642	Down
18	ABAT	0.670477153	0.036378835	0.266603642	Up
26033	ATRNL1	-0.672215093	0.036404715	0.266633457	Down
9912	ARHGAP44	-0.706984107	0.036495265	0.2671366	Down
1901	S1PR1	0.672962533	0.036524474	0.267190409	Up
4034	LRCH4	0.713570556	0.036723901	0.268328133	Up
23229	ARHGEF9	-0.66667803	0.036783444	0.268375655	Down
3957	LGALS2	-0.673096981	0.036856981	0.268375655	Down
57644	MYH7B	-0.667740283	0.036858945	0.268375655	Down
63925	ZNF335	-0.671396069	0.036870263	0.268375655	Down
26024	PTCD1	-0.668977023	0.03693988	0.268375655	Down
3164	NR4A1	0.701766742	0.036990233	0.268375655	Up
64328	XPO4	0.694022105	0.03700605	0.268375655	Up
55636	CHD7	-0.676701549	0.037018652	0.268375655	Down
3034	HAL	0.670790769	0.037020769	0.268375655	Up
221061	FAM171A1	-0.683143657	0.037045656	0.268375655	Down
90861	HN1L	0.727600105	0.037059727	0.268375655	Up
90627	STARD13	0.666986471	0.037342406	0.270071961	Up
3280	HES1	-0.664683726	0.037367095	0.270071961	Down
140460	ASB7	0.670587544	0.037414509	0.270071961	Up
1729	DIAPH1	0.673595644	0.037422885	0.270071961	Up
54551	MAGEL2	0.669075626	0.037493278	0.270071961	Up
56928	SPPL2B	-0.663503799	0.037514904	0.270071961	Down
23228	PLCL2	0.66870184	0.037665632	0.270977127	Up
55565	ZNF821	-0.669063538	0.037816218	0.271441835	Down
7360	UGP2	-0.672241202	0.037850077	0.271525432	Down
9817	KEAP1	-0.66921215	0.037948587	0.271912971	Down
6631	SNRPC	-0.672293339	0.038039905	0.272407614	Down
10825	NEU3	0.662715678	0.038112763	0.272609954	Up
2826	CCR10	0.665107338	0.038469685	0.274241445	Up
23143	LRCH1	0.663261423	0.038547297	0.274241445	Up
950	SCARB2	0.670500398	0.038552308	0.274241445	Up
4982	TNFRSF11B	0.65946052	0.038580815	0.274241445	Up
6232	RPS27	-0.675259483	0.038677377	0.274241445	Down
4892	NRAP	-0.671598275	0.038732317	0.274381321	Down
10208	USPL1	0.668663242	0.038859053	0.275050991	Up
4163	MCC	0.705439525	0.038994288	0.27584848	Up
7314	UBB	0.656338268	0.039399431	0.277838516	Up
57761	TRIB3	-0.675311065	0.039411975	0.277838516	Down
10632	ATP5L	-0.693469143	0.039795803	0.279261868	Down
9982	FGFBP1	-0.657633428	0.039796644	0.279261868	Down
624	BDKRB2	0.673019781	0.039907163	0.279876738	Up
8761	PABPC4	-0.661491979	0.039980846	0.280072129	Down
2821	GPI	-0.658974119	0.04007448	0.28041096	Down
56159	TEX11	0.657369697	0.040248219	0.280981385	Up
56270	WDR45L	-0.667434659	0.040268639	0.280981385	Down
1263	PLK3	0.661715114	0.040287614	0.280981385	Up
10127	ZNF263	0.689915505	0.040465141	0.281528673	Up
10273	STUB1	0.67774041	0.040532279	0.281835369	Up
6097	RORC	-0.688240375	0.040811417	0.283453843	Down
6039	RNASE6	0.655990214	0.0408637	0.283655805	Up
29109	FHOD1	0.699710779	0.041120142	0.28478902	Up
9240	PNMA1	0.654554635	0.041185145	0.285077697	Up
23049	SMG1	0.6675424	0.041225213	0.285193551	Up
5653	KLK6	-0.660926228	0.041409491	0.285863226	Down
55001	TTC22	-0.650437076	0.041415557	0.285863226	Down
9369	NRXN3	0.657127085	0.041528187	0.286155897	Up
84942	WDR73	0.670634781	0.041876023	0.287418589	Up
4133	MAP2	-0.647311375	0.042026598	0.288290202	Down
9520	NPEPPS	0.649983994	0.042097344	0.28841371	Up
83481	EPPK1	-0.652639913	0.042115385	0.28841371	Down
8543	LMO4	-0.648123653	0.042227504	0.289019602	Down
10953	TOMM34	-0.648416448	0.042324848	0.289330491	Down
27156	RTDR1	-0.652772747	0.042447136	0.289750415	Down
1022	CDK7	0.648491878	0.042476501	0.289750415	Up
646	BNC1	-0.675291494	0.042550593	0.290093949	Down
4824	NKX3-1	0.65035252	0.0427475	0.290951236	Up
5784	PTPN14	0.659463006	0.042747744	0.290951236	Up
5471	PPAT	0.658831934	0.042777529	0.290991936	Up
91289	LMF2	-0.647045276	0.04287298	0.291412061	Down
8764	TNFRSF14	-0.65214142	0.042962577	0.291412061	Down
9321	TRIP11	0.653299256	0.042965593	0.291412061	Up
79087	ALG12	-0.644663944	0.042969066	0.291412061	Down
1558	CYP2C8	0.648971163	0.042982325	0.291412061	Up
55049	C19orf60	-0.664141567	0.043226909	0.292524072	Down
53371	NUP54	0.651031392	0.043252505	0.292524072	Up
23193	GANAB	0.650848477	0.043320581	0.292645959	Up
3284	HSD3B2	0.659311783	0.0434538	0.29269008	Up
29986	SLC39A2	0.647318747	0.043474356	0.29269008	Up
4241	MFI2	-0.75159972	0.043488026	0.29269008	Down
6309	SC5DL	-0.672005084	0.043489023	0.29269008	Down
3054	HCFC1	0.65368856	0.043544947	0.29269008	Up
23787	MTCH1	-0.655699678	0.043558555	0.29269008	Down
219595	FOLH1B	-0.645963323	0.043699359	0.293023019	Down
774	CACNA1B	-0.641328262	0.043830251	0.293595718	Down
50649	ARHGEF4	-0.646618473	0.043874964	0.293595718	Down
10367	CBARA1	0.642300478	0.043895267	0.293595718	Up
22853	LMTK2	-0.642363532	0.043950496	0.293595718	Down
1008	CDH10	0.653961449	0.043952893	0.293595718	Up
25844	YIPF3	-0.65301768	0.044136692	0.294341022	Down
944	TNFSF8	0.64075397	0.044136706	0.294341022	Up
322	APBB1	0.657021434	0.044167844	0.294365185	Up
54148	MRPL39	-0.669692878	0.044202666	0.294365185	Down
23624	CBLC	-0.652759068	0.044212572	0.294365185	Down
7010	TEK	0.670830664	0.044362283	0.29514481	Up
132	ADK	0.641366781	0.044506837	0.295384233	Up
6732	SRPK1	-0.669091191	0.044529747	0.295384233	Down
29083	GTPBP8	0.689863094	0.04465342	0.295529728	Up
7249	TSC2	0.701778244	0.044922456	0.296945569	Up
10745	PHTF1	0.641672953	0.045009438	0.297081733	Up
51510	CHMP5	0.642402893	0.045256639	0.29839113	Up
7978	MTERF	-0.657494899	0.0452831	0.298404646	Down
25924	MYRIP	-0.678812281	0.045371338	0.298825022	Down
51014	TMED7	0.645927294	0.045469384	0.298868602	Up
2922	GRP	0.644848651	0.04547286	0.298868602	Up
8200	GDF5	-0.648385848	0.045520246	0.298868602	Down
55619	DOCK10	0.639737263	0.045587383	0.299119788	Up
9686	VGLL4	0.682736243	0.045682717	0.299584516	Up
3842	TNPO1	0.64309348	0.04574609	0.299648785	Up
23380	SRGAP2	0.660131294	0.045803547	0.299648785	Up
23543	RBFOX2	0.655478633	0.045855037	0.299648785	Up
90410	IFT20	0.637619193	0.045879842	0.299648785	Up
9857	CEP350	0.645354968	0.045917268	0.299648785	Up
51186	WBP5	0.647383402	0.045920202	0.299648785	Up
7077	TIMP2	0.637485514	0.045937649	0.299648785	Up
323	APBB2	0.657645326	0.045993199	0.29969129	Up
6422	SFRP1	-0.636603067	0.046148786	0.300544888	Down
54851	ANKRD49	-0.6353734	0.046188136	0.300617785	Down
1387	CREBBP	0.659799912	0.046244907	0.300639947	Up
78990	OTUB2	0.643512294	0.046297622	0.300639947	Up
9203	ZMYM3	-0.643475997	0.046310947	0.300639947	Down
3077	HFE	0.643971467	0.046639439	0.302041611	Up
689	BTF3	0.638132309	0.04673514	0.302145477	Up
443	ASPA	-0.636398874	0.046891566	0.302198554	Down
2289	FKBP5	0.684877567	0.047024726	0.302562867	Up
9289	GPR56	-0.649552728	0.047027933	0.302562867	Down
6654	SOS1	-0.640746557	0.047228757	0.303375891	Down
6713	SQLE	-0.636154183	0.047286431	0.303586833	Down
202181	LOC202181	-0.663403589	0.047386122	0.304067169	Down
11083	DIDO1	0.636890251	0.047610633	0.305127411	Up
1573	CYP2J2	-0.642117938	0.047636477	0.305127411	Down
284439	SLC25A42	-0.642630503	0.047813813	0.305848271	Down
3627	CXCL10	-0.631564071	0.047941519	0.306277706	Down
114088	TRIM9	0.629954962	0.048004609	0.306277706	Up
65986	ZBTB10	-0.634023139	0.048006224	0.306277706	Down
54847	SIDT1	0.64471043	0.048099129	0.306550448	Up
10675	CSPG5	-0.639729507	0.048185709	0.306942214	Down
8427	ZNF282	-0.630051155	0.048227855	0.307050674	Down
2823	GPM6A	-0.62946049	0.048334276	0.30756803	Down
9754	STARD8	0.632727745	0.048430211	0.307962327	Up
79001	VKORC1	0.645583403	0.048471819	0.307962327	Up
9256	BZRAP1	-0.627352336	0.048543986	0.308153964	Down
9416	DDX23	0.717292922	0.048606598	0.308153964	Up
9107	MTMR6	0.629468613	0.048622433	0.308153964	Up
79695	GALNT12	-0.658497139	0.048688582	0.308377835	Down
3624	INHBA	0.642249457	0.048868429	0.309187484	Up
197320	ZNF778	-0.636062856	0.048917588	0.309187484	Down
84298	LLPH	-0.634099111	0.048948904	0.309225533	Down
5160	PDHA1	-0.658491532	0.049114867	0.309358348	Down
3608	ILF2	-0.639508043	0.049121773	0.309358348	Down
10462	CLEC10A	-0.628578164	0.049269258	0.309658673	Down
2700	GJA3	-0.630526052	0.049311393	0.309658673	Down
7701	ZNF142	-0.63523347	0.049321453	0.309658673	Down
10040	TOM1L1	0.632989584	0.049362325	0.309756193	Up
79814	AGMAT	0.626387469	0.049392467	0.309786307	Up
54550	NECAB2	0.665846865	0.049468824	0.309913868	Up
3854	KRT6B	-0.644141642	0.049543977	0.309913868	Down
2520	GAST	-0.637784134	0.049556983	0.309913868	Down
8538	BARX2	-0.624378682	0.049589158	0.309913868	Down
6425	SFRP5	-0.62729025	0.049590275	0.309913868	Down
2328	FMO3	0.626198561	0.049634971	0.310034686	Up
4072	EPCAM	-0.632025091	0.049675626	0.310122722	Down
57194	ATP10A	0.630445266	0.049712013	0.310122722	Up
